# Supplementary material for: Role of Surface Chemistry in Protein Remodeling at the Cell-Material Interface
Source: PLOS journal article supplement (doi:10.1371/journal.pone.0019610), 2011-05-09
Supplement: S2 (10.1371/journal.pone.0019610.s002) [file journal.pone.0019610.s002]

# **Role of Surface Chemistry in Protein Remodeling at the Cell-Material Interface**

**Virginia Llopis-Hernández<sup>1</sup>⊥, Patricia Rico<sup>1,2</sup>⊥, José Ballester-Beltrán<sup>1</sup>, David Moratal<sup>1</sup>, Manuel Salmerón-Sánchez<sup>1,2,3\*</sup>**

**1** Center for Biomaterials and Tissue Engineering, Universidad Politécnica de Valencia, Spain, **2** CIBER de Bioingeniería, Biomateriales y Nanomedicina (CIBER-BBN), Valencia, Spain, **3** Regenerative Medicine Unit, Centro de Investigación Príncipe Felipe, Valencia, Spain

⊥ These two authors contributed equally to this work. \* Email: [masalsan@fis.upv.es](mailto:masalsan@fis.upv.es)

## **Supplementary Figures**

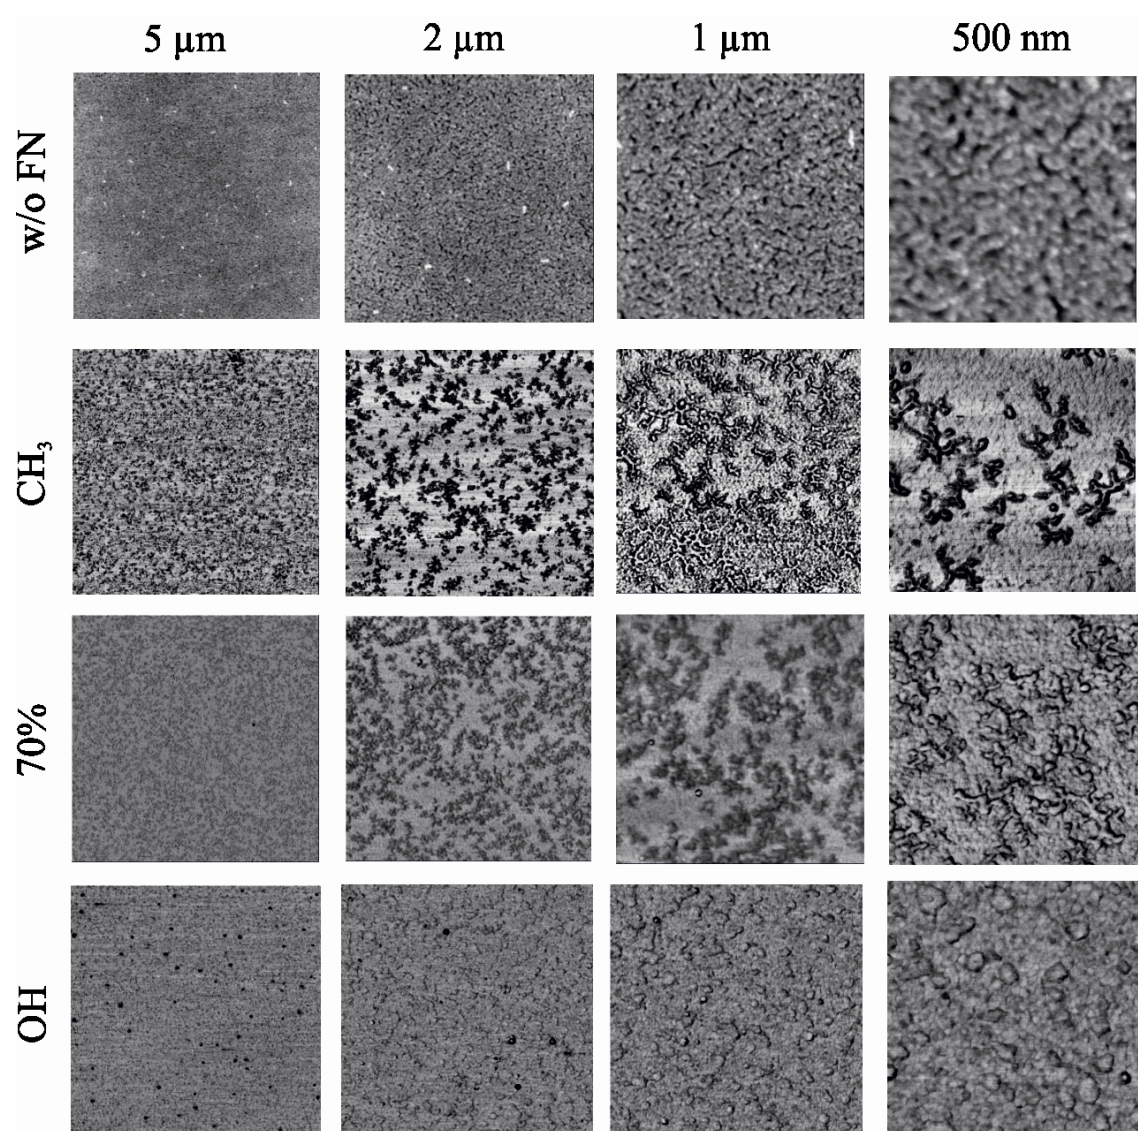

**Figure S2.** Fibronectin distribution on the different substrates as observed by the phase magnitude in AFM at different magnifications. The protein was adsorbed for 10 min from a solution of concentration 5  $\mu\text{g/mL}$ .
